# Supplementary material for: An isolable, metastable, geometrically unique manganese(iv) trihydrazide complex poised for reactivity
Source: Royal Society of Chemistry journal article supplement (doi:10.1039/c1cc13427b), 2011-01-01
Supplement: c1cc13427b.pdf [file c1cc13427b.pdf]

**Supporting Information for**  
**An isolable, metastable, geometrically unique manganese(IV)**  
**trihydrazide complex poised for reactivity.**  
*Shivaiah Vaddypally, Sandeep Kondaveeti, Michael J. Zdilla\**

## Table of Contents

|                                                        |    |
|--------------------------------------------------------|----|
| Experimental.....                                      | 3  |
| <sup>1</sup> H NMR spectra.....                        | 5  |
| UV-Visible Spectrum.....                               | 5  |
| <sup>1</sup> H NMR and GC/MS detection of aniline..... | 6  |
| FTIR spectroscopy.....                                 | 8  |
| EPR spectroscopy.....                                  | 8  |
| X-Ray Data: Metrics Summary.....                       | 9  |
| X-Ray Data Tables for <b>1a</b> .....                  | 10 |
| X-Ray Data Tables for <b>1b</b> .....                  | 18 |

**General:** All manipulations were performed under an anaerobic, dry atmosphere of nitrogen gas using standard Glove Box and Schlenk line techniques. All reagents were used as purchased from commercial sources (Aldrich or Strem Chemical) unless otherwise noted. Solvents were distilled from sodium benzophenone ketyl (THF, Et<sub>2</sub>O, HMDS), or purified using an Innovative Technology PurSolv solvent purification system (all other solvents) and stored in the glove box over activated 4 Å molecular sieves for 24 h before use. MnF<sub>3</sub>, MnCl<sub>2</sub>, Mn(OAc)<sub>3</sub> were purchased from Strem chemicals. Li<sup>t</sup>BuNH is synthesized according to literature procedure.<sup>4</sup> Mn[N(SiMe<sub>3</sub>)<sub>2</sub>]<sub>2</sub> was prepared from the literature protocol.<sup>5</sup> Benzene-*d*<sub>6</sub> was stored over 4 Å molecular sieves or Na/Pb alloy<sup>14</sup> for 24 h prior to use. X-Ray structural determinations were performed on a Bruker APEX II DUO diffractometer equipped with an Oxford Cryosystems Cryostream low temperature device. <sup>1</sup>H NMR spectra were recorded in benzene-*d*<sub>6</sub> on a Bruker Advance 400 MHz spectrometer. UV-visible spectra were recorded on UV-1800 Shimadzu UV spectrophotometer. GC-MS analyses were performed on Hewlett Packard, HP 6890 GC system. FT-IR spectra were recorded in the range of 400-4000 cm<sup>-1</sup> on a Nicolet Varian Cary 380 FT-IR under nitrogen atmosphere using a KBr pellet press. Elemental analyses were carried out by Midwest Microlab, LLC, Indianapolis, IN.

**General procedure for Preparation of Li<sub>2</sub>Mn(IV)(dph)<sub>3</sub>L<sub>2</sub> (L = THF, Et<sub>2</sub>O; dph = *N,N'*-diphenylhydrazide).** 0.1 mmol of Mn precursor was suspended/dissolved in 10 mL dry THF followed by addition 0.047 g (0.6 mmol) LiNH<sup>t</sup>Bu and stirred for 20 minutes. To this mixture, 0.4 mmol of hydrazide source (diphenyl hydrazine or azobenzene) was added. The resulting green mixture is stirred an additional 15 minutes and filtered. The filtrate is concentrated under vacuum to ca. 2 ml, and crystallized at room temperature by vapor diffusion of *n*-pentane or hexamethyldisiloxane as precipitant. The dark brown crystals are filtered after 24 hrs and dried in vacuo.

**Li<sub>2</sub>Mn(IV)(dph)<sub>3</sub>(Et<sub>2</sub>O)<sub>2</sub> (1a)** was prepared by the general procedure with the following changes: The reaction mixture is dried and extracted into diethyl ether, and filtered. The resulting blue filtrate is concentrated and crystallized by slow evaporation of the ether solution of 1a hexamethyldisiloxane in a vapor diffusion double vial setup. This procedure results in formation of dark brown crystals, which are further washed with pentane to remove azobenzene. Yields based on Mn are given in Table 2. UV-Vis (C<sub>6</sub>H<sub>6</sub>): λ<sub>max</sub>[nm] (log ε, assignment) = 280 (3.33, ct), 380 (2.44, ct), 631 (2.40, *d-d*)., Anal. Calcd for C<sub>44</sub>H<sub>50</sub>Li<sub>2</sub>MnN<sub>6</sub>O<sub>2</sub>: C, 69.19; H, 6.60; N, 11.00. Found: C, 68.90; H, 5.81; N, 10.58.

**Li<sub>2</sub>Mn(IV)(dph)<sub>3</sub>(THF)<sub>2</sub> (1b)** was prepared by the general procedure using 0.037 g (0.1 mmol) of Mn(NR<sub>2</sub>)<sub>2</sub>, 10 mL dry THF, 0.047 g LiNH<sup>t</sup>Bu (0.6mmol) and 0.0736 g (0.4 mmol) of diphenylhydrazine. Yield. 0.062 g (0.082 mmol, 82% based on Mn). <sup>1</sup>H NMR (400 MHz, C<sub>6</sub>D<sub>6</sub> w/ excess THF): δ = -10.6 (br, 2H, NPh-*p*-H), 1.3 (v. br., THF), 3.4 (v. br. THF), 6.6 (s, 10 H), 9.7 (br, 4 H, NPh-*o*-H), 10.9 (v. br. 4H, NPh-*m*-H).

**Table S1.** Synthetic conditions and yields<sup>a</sup> for preparation of **1a** and **1b**.

| Mn source                                            | dph <sup>2-</sup><br>source <sup>b</sup> | Yield<br>(%) | L <sup>c</sup>    |
|------------------------------------------------------|------------------------------------------|--------------|-------------------|
| MnF <sub>3</sub>                                     | dph                                      | 28           | Et <sub>2</sub> O |
| Mn(OAc) <sub>3</sub>                                 | dph                                      | 54           | Et <sub>2</sub> O |
| MnCl <sub>2</sub>                                    | dph                                      | 61           | Et <sub>2</sub> O |
| Mn[N(SiMe <sub>3</sub> ) <sub>2</sub> ] <sub>2</sub> | dph                                      | 82           | THF               |
| MnCl <sub>2</sub>                                    | azobenzene                               | 23           | Et <sub>2</sub> O |
| Mn(OAc) <sub>3</sub>                                 | azobenzene                               | 23           | Et <sub>2</sub> O |

[a] Yields are calculated based on Mn. [b] Ligand source is either *N,N'*-diphenylhydrazine (dph) or azobenzene. [c] **1a** L = Et<sub>2</sub>O, **1b** L = THF.

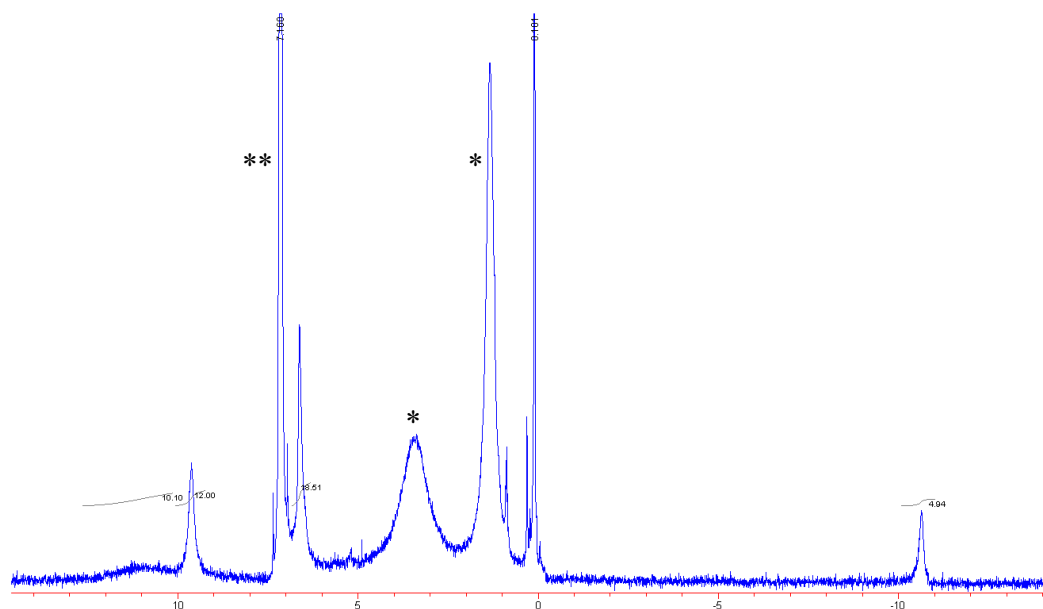

Figure S1.  $^1\text{H}$  NMR spectrum of **1b** in  $\text{C}_6\text{D}_6$  with excess THF ligand.\* Residual protiosolvent signal indicated by \*\*.

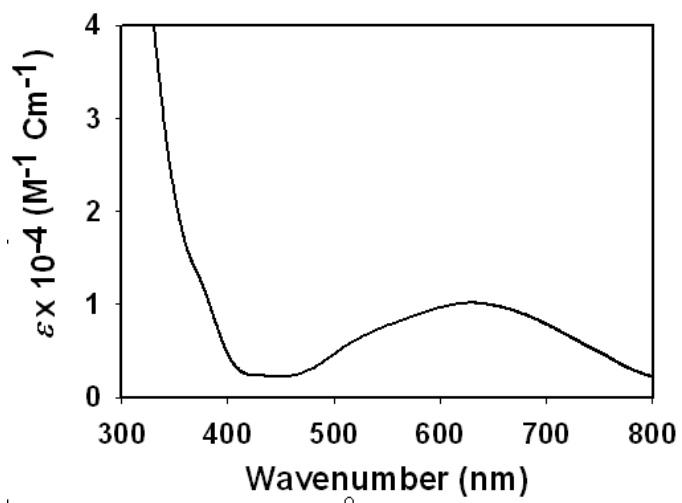

Figure S2. UV-Visible absorption spectrum of **1a** in Benzene.

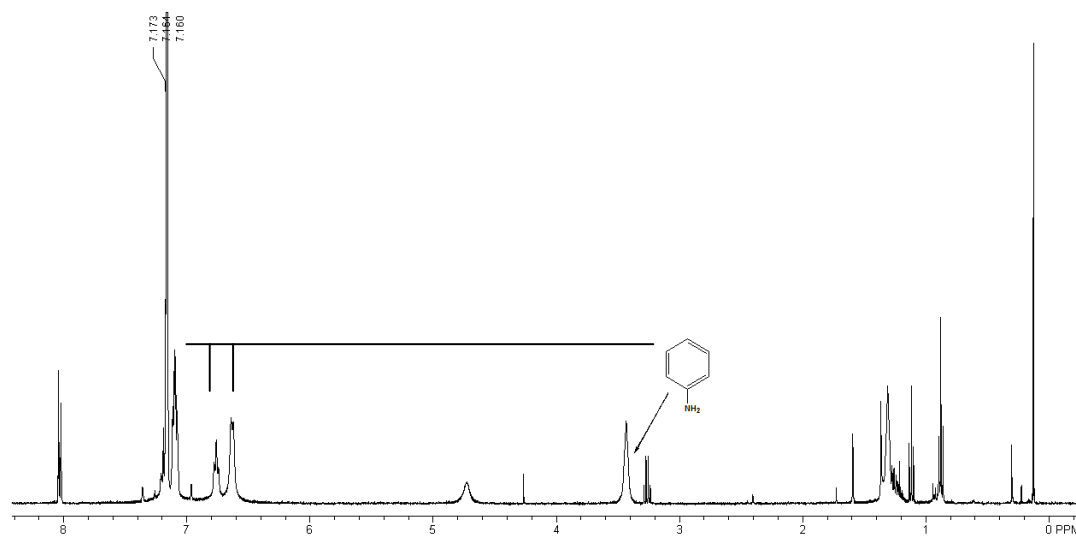

Figure S3.  $^1\text{H-NMR}$  of pentane filtrate from synthesis of **1** in  $\text{C}_6\text{D}_6$  demonstrating the presence of aniline.

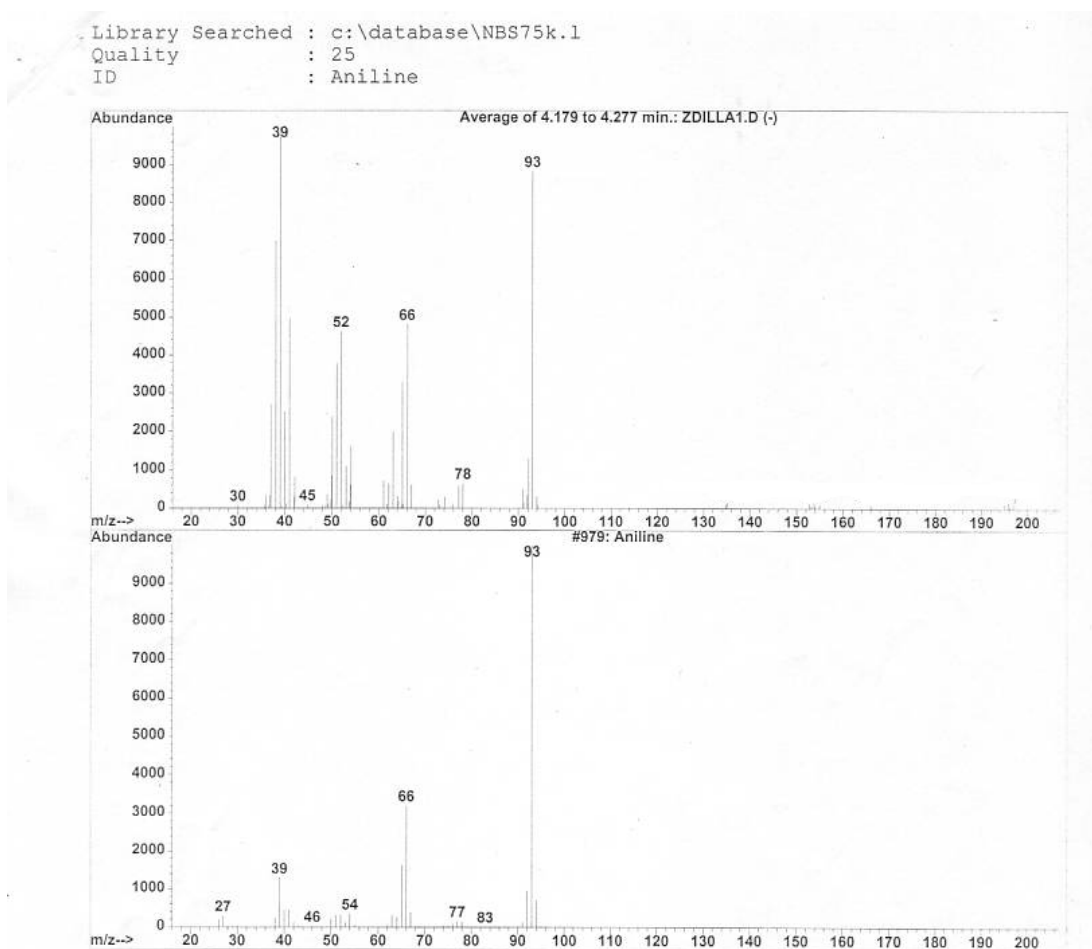

Figure S5. Top: MS of aniline GC-MS peak for pentane wash of filtrate after isolation of **1**. Bottom: Aniline reference spectrum.

**FTIR Spectroscopy.** The FTIR spectrum of the intermediate from addition of  $\text{LiNH}^t\text{Bu}$  to  $\text{Mn}[\text{N}(\text{SiMe}_3)_2]_2$  was recorded in the range of 400-4000  $\text{cm}^{-1}$  on a Nicolet Varian Cary 380 FT-IR under nitrogen atmosphere using a KBr pellet press.

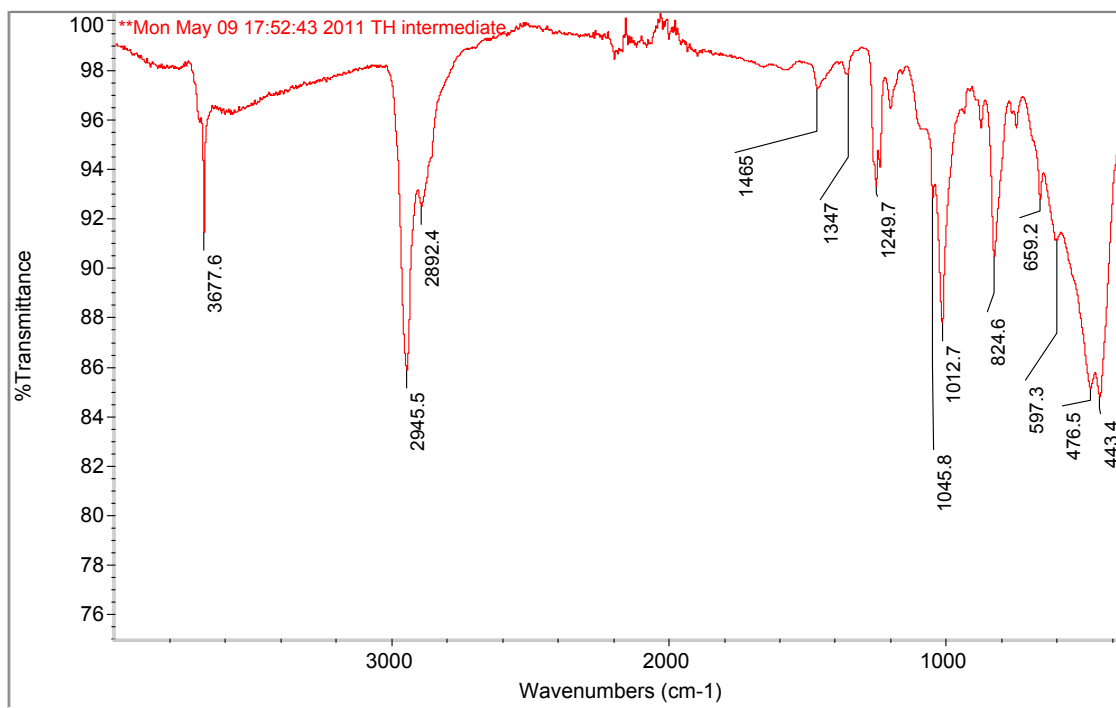

**Figure S6.** Infrared spectrum of the intermediate addition of  $\text{LiNH}^t\text{Bu}$  to  $\text{Mn}[\text{N}(\text{SiMe}_3)_2]_2$ . N-H stretch of intermediate amides is seen at  $3678 \text{ cm}^{-1}$ , and the  $\text{M}=\text{NR}$  stretch of equilibrium terminal imido species is seen at  $1250 \text{ cm}^{-1}$ .

**EPR Spectroscopy** EPR Spectra were acquired on a Bruker EMX EPR spectrometer equipped with a liquid He cryostat. Spectra were recorded at 13K. MW power = 20.12 mW. Mod Amplitude = 10.0 dB for  $\text{Mn}[\text{N}(\text{SiMe}_3)_2]_2$  and **1**, Mod. Amplitude = 6 dB for  $\text{Mn}[\text{N}(\text{SiMe}_3)_2]_2 + \text{LiNH}^t\text{Bu}$ .



## X-Ray Structural Data

**Table 1** Selected bond distances (Å) and angles (°)<sup>a</sup> for Li<sub>2</sub>Mn(N<sub>2</sub>Ph<sub>2</sub>)<sub>3</sub>(L)<sub>2</sub> (L = Et<sub>2</sub>O: **1a**, L = THF: **1b**)

|                                        | <b>1a</b>                        | <b>1b</b>                        |
|----------------------------------------|----------------------------------|----------------------------------|
| Mn(1)-N(1/2/3)                         | 2.0235(18)/1.9656(18)/2.0231(18) | 2.0274(11)/1.9685(11)/2.0279(11) |
| N(1/3)-N(2/3A)                         | 1.413(2)/1.446(3)                | 1.4173(16)/1.449(2)              |
| N(1/2)...N(3/2A)                       | 2.9266(27)/3.1420(35)            | 3.1570(24)                       |
| Li(1)-N(1/3)                           | 2.037(4)/2.046(5)                | 2.025(3)/2.040(3)                |
| Mn(1)...Li(1)                          | 2.821(4)                         | 2.828(3)                         |
| Li(1)-O(1)                             | 1.916(4)                         | 1.902(3)                         |
| Li(1)-C(8/14A)                         | 2.771(5)/2.741(5)                | 2.713(3)/2.749(3)                |
| N(1/3)-Mn(1)-N(2/3A)                   | 41.44(7)/41.88(9)                | 41.52(5)/41.86(6)                |
| N(1/2)-Mn(1)-N(3/2A)                   | 92.64(8)/106.12(11)              | 91.83(5)/106.62(7)               |
| N(1/2/2)-Mn(1)-N(3A/3/1A)              | 106.88(8)/108.99(7)/122.21(8)    | 106.09(5)/108.85(5)/123.44(5)    |
| N(1/2)-Mn(1)-N(1A/3A)                  | 159.24(11)/142.86(8)             | 160.96(7)/142.46(5)              |
| N(1)-Li(1)-N(3)                        | 91.56(18)                        | 91.54(12)                        |
| N(1/3)-Li(1)-O(1)                      | 135.8(2)/132.4(2)                | 138.92(16)/129.36(15)            |
| Dihedral Propellar Angles <sup>b</sup> |                                  |                                  |
| Mn(1), N(1,2)                          | 49.1                             | 48.1                             |
| Mn(1), N(3,3A)                         | 54.0                             | 54.2                             |

<sup>a</sup> Divided entries refer to separate, related atoms and their associated metrics in the order given, e.g., N(1/2/2)-Mn(1)-N(3A/3/1A) denotes 3 angles, N(1)-Mn(1)-N(3A), N(2)-Mn(1)-N(3), and N(2)-Mn(1)-N(1A). <sup>b</sup> The tilt angle of the “propeller blade” is calculated, for example, as the angle between the N(1)-Mn(1)-N(2) plane and the equatorial molecular plane, the latter fitted (least squares) through all the Mn and N atoms of the complex.

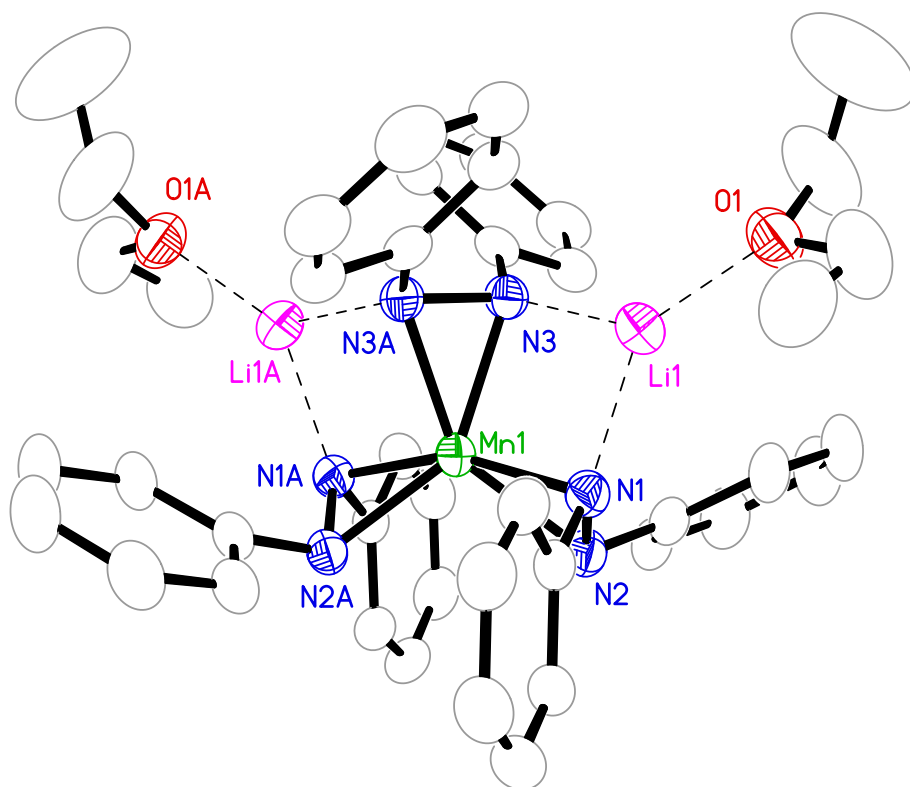

**Figure X1.** Structure of  $\text{Li}_2\text{Mn}(\text{N}_2\text{Ph}_2)_3(\text{Et}_2\text{O})_2$  (**1a**) with thermal ellipsoids at 50% probability level. Hydrogen atoms are omitted for clarity.

**Table X1.1.** Sample and crystal data for **1a**.

|                               |                                                                                                                                 |
|-------------------------------|---------------------------------------------------------------------------------------------------------------------------------|
| <b>Chemical formula</b>       | $\text{C}_{44}\text{H}_{50}\text{Li}_2\text{MnN}_6\text{O}_2$                                                                   |
| <b>Formula weight</b>         | 763.72                                                                                                                          |
| <b>Temperature</b>            | 173(2) K                                                                                                                        |
| <b>Wavelength</b>             | 0.71073 Å                                                                                                                       |
| <b>Crystal size</b>           | 0.050 x 0.100 x 0.200 mm                                                                                                        |
| <b>Crystal system</b>         | monoclinic                                                                                                                      |
| <b>Space group</b>            | C 1 2/c 1                                                                                                                       |
| <b>Unit cell dimensions</b>   | $a = 11.9361(15)$ Å $\alpha = 90^\circ$<br>$b = 18.107(2)$ Å $\beta = 96.050(2)^\circ$<br>$c = 19.001(2)$ Å $\gamma = 90^\circ$ |
| <b>Volume</b>                 | $4083.8(9)$ Å <sup>3</sup>                                                                                                      |
| <b>Z</b>                      | 4                                                                                                                               |
| <b>Density (calculated)</b>   | $1.242$ Mg/cm <sup>3</sup>                                                                                                      |
| <b>Absorption coefficient</b> | $0.367$ mm <sup>-1</sup>                                                                                                        |
| <b>F(000)</b>                 | 1612                                                                                                                            |

---

**Table X1.2. Data collection and structure refinement for 1a.**

---

|                                         |                                                                                                                                                               |
|-----------------------------------------|---------------------------------------------------------------------------------------------------------------------------------------------------------------|
| <b>Theta range for data collection</b>  | 2.16 to 27.48°                                                                                                                                                |
| <b>Index ranges</b>                     | -15<=h<=15, -23<=k<=23, -24<=l<=23                                                                                                                            |
| <b>Reflections collected</b>            | 17501                                                                                                                                                         |
| <b>Independent reflections</b>          | 4676 [R(int) = 0.0184]                                                                                                                                        |
| <b>Max. and min. transmission</b>       | 0.9819 and 0.9303                                                                                                                                             |
| <b>Structure solution technique</b>     | direct methods                                                                                                                                                |
| <b>Structure solution program</b>       | SHELXS-97 (Sheldrick, 2008)                                                                                                                                   |
| <b>Refinement method</b>                | Full-matrix least-squares on F <sup>2</sup>                                                                                                                   |
| <b>Refinement program</b>               | SHELXL-97 (Sheldrick, 2008)                                                                                                                                   |
| <b>Function minimized</b>               | $\Sigma w(F_o^2 - F_c^2)^2$                                                                                                                                   |
| <b>Data / restraints / parameters</b>   | 4676 / 0 / 251                                                                                                                                                |
| <b>Goodness-of-fit on F<sup>2</sup></b> | 1.048                                                                                                                                                         |
| <b>Final R indices</b>                  | 3944 data; I>2σ(I) R1 = 0.0544, wR2 = 0.1532<br>all data R1 = 0.0647, wR2 = 0.1641                                                                            |
| <b>Weighting scheme</b>                 | w=1/[σ <sup>2</sup> (F <sub>o</sub> <sup>2</sup> )+(0.0859P) <sup>2</sup> +7.2898P]<br>where P=(F <sub>o</sub> <sup>2</sup> +2F <sub>c</sub> <sup>2</sup> )/3 |
| <b>Largest diff. peak and hole</b>      | 0.688 and -0.586 eÅ <sup>-3</sup>                                                                                                                             |
| <b>R.M.S. deviation from mean</b>       | 0.067 eÅ <sup>-3</sup>                                                                                                                                        |

---

**Table X1.3. Atomic coordinates and equivalent isotropic atomic displacement parameters ( $\text{\AA}^2$ ) for 1a.**

U(eq) is defined as one third of the trace of the orthogonalized  $U_{ij}$  tensor.

|     | x/a         | y/b         | z/c         | U(eq)       |
|-----|-------------|-------------|-------------|-------------|
| Mn1 | 0.0         | 0.04180(2)  | 0.75        | 0.02942(16) |
| N1  | 0.05792(16) | 0.02167(10) | 0.65553(10) | 0.0317(4)   |
| N2  | 0.96546(16) | 0.97656(10) | 0.66790(9)  | 0.0318(4)   |
| N3  | 0.95370(14) | 0.14615(10) | 0.72220(9)  | 0.0315(4)   |
| Li1 | 0.0139(4)   | 0.1270(2)   | 0.6269(2)   | 0.0430(9)   |
| O1  | 0.01188(17) | 0.18499(11) | 0.54243(10) | 0.0516(5)   |
| C1  | 0.16189(19) | 0.98353(12) | 0.66302(10) | 0.0308(4)   |
| C2  | 0.2601(2)   | 0.02580(14) | 0.66829(12) | 0.0373(5)   |
| C3  | 0.3647(2)   | 0.99181(16) | 0.67502(13) | 0.0436(6)   |
| C4  | 0.3732(2)   | 0.91550(16) | 0.67596(13) | 0.0451(6)   |
| C5  | 0.2756(2)   | 0.87348(14) | 0.66990(12) | 0.0413(5)   |
| C6  | 0.1707(2)   | 0.90643(12) | 0.66398(11) | 0.0347(5)   |
| C7  | 0.86640(19) | 0.99259(13) | 0.62390(11) | 0.0336(5)   |
| C8  | 0.8646(2)   | 0.02716(15) | 0.55776(12) | 0.0401(5)   |
| C9  | 0.7625(2)   | 0.03988(17) | 0.51715(14) | 0.0510(7)   |
| C10 | 0.6622(2)   | 0.0178(2)   | 0.54065(16) | 0.0575(8)   |
| C11 | 0.6638(2)   | 0.98216(17) | 0.60532(15) | 0.0499(7)   |
| C12 | 0.7641(2)   | 0.96906(14) | 0.64668(12) | 0.0390(5)   |
| C13 | 0.85625(18) | 0.17956(12) | 0.74247(12) | 0.0328(5)   |
| C14 | 0.8577(2)   | 0.23110(12) | 0.79721(12) | 0.0362(5)   |
| C15 | 0.7582(2)   | 0.26262(14) | 0.81491(14) | 0.0435(6)   |
| C16 | 0.6563(2)   | 0.24380(16) | 0.77851(16) | 0.0493(6)   |
| C17 | 0.6540(2)   | 0.19387(15) | 0.72272(15) | 0.0459(6)   |
| C18 | 0.75160(19) | 0.16252(13) | 0.70428(14) | 0.0390(5)   |
| C19 | 0.0811(3)   | 0.1748(3)   | 0.4866(2)   | 0.0806(11)  |
| C20 | 0.1952(4)   | 0.1464(3)   | 0.5143(2)   | 0.0909(13)  |
| C21 | 0.9127(4)   | 0.2283(3)   | 0.5207(3)   | 0.0986(15)  |
| C22 | 0.9332(6)   | 0.2979(4)   | 0.4998(5)   | 0.171(3)    |

**Table X1.4. Bond lengths (Å) for 1a.**

|           |            |          |            |
|-----------|------------|----------|------------|
| Mn1-N2#1  | 1.9656(18) | Mn1-N2   | 1.9656(18) |
| Mn1-N3    | 2.0231(18) | Mn1-N3#1 | 2.0231(18) |
| Mn1-N1#1  | 2.0234(18) | Mn1-N1   | 2.0235(18) |
| Mn1-Li1#1 | 2.821(4)   | Mn1-Li1  | 2.821(4)   |
| N1-N2     | 1.413(2)   | N1-C1    | 1.414(3)   |
| N1-Li1    | 2.037(5)   | N2-C7    | 1.405(3)   |
| N3-C13    | 1.400(3)   | N3-N3#1  | 1.446(3)   |
| N3-Li1    | 2.046(5)   | Li1-O1   | 1.916(4)   |
| Li1-C14#1 | 2.741(5)   | O1-C19   | 1.423(4)   |
| O1-C21    | 1.444(4)   | C1-C2    | 1.395(3)   |
| C1-C6     | 1.400(3)   | C2-C3    | 1.386(4)   |
| C3-C4     | 1.385(4)   | C4-C5    | 1.385(4)   |
| C5-C6     | 1.381(3)   | C7-C8    | 1.402(3)   |
| C7-C12    | 1.404(3)   | C8-C9    | 1.391(4)   |
| C9-C10    | 1.380(4)   | C10-C11  | 1.387(4)   |
| C11-C12   | 1.382(4)   | C13-C14  | 1.396(3)   |
| C13-C18   | 1.411(3)   | C14-C15  | 1.390(3)   |
| C14-Li1#1 | 2.741(5)   | C15-C16  | 1.377(4)   |
| C16-C17   | 1.391(4)   | C17-C18  | 1.374(4)   |
| C19-C20   | 1.499(6)   | C21-C22  | 1.351(7)   |

Symmetry transformations used to generate equivalent atoms:

#1 -x+2, y, -z+3/2

**Table X1.5. Bond angles (°) for 1a.**

|                |            |                |           |
|----------------|------------|----------------|-----------|
| N2#1-Mn1-N2    | 106.12(11) | N2#1-Mn1-N3    | 142.86(7) |
| N2-Mn1-N3      | 108.99(7)  | N2#1-Mn1-N3#1  | 108.99(7) |
| N2-Mn1-N3#1    | 142.86(8)  | N3-Mn1-N3#1    | 41.88(9)  |
| N2#1-Mn1-N1#1  | 41.45(7)   | N2-Mn1-N1#1    | 122.21(8) |
| N3-Mn1-N1#1    | 106.88(7)  | N3#1-Mn1-N1#1  | 92.65(8)  |
| N2#1-Mn1-N1    | 122.21(8)  | N2-Mn1-N1      | 41.45(7)  |
| N3-Mn1-N1      | 92.64(8)   | N3#1-Mn1-N1    | 106.88(8) |
| N1#1-Mn1-N1    | 159.25(11) | N2#1-Mn1-Li1#1 | 72.34(10) |
| N2-Mn1-Li1#1   | 163.92(11) | N3-Mn1-Li1#1   | 70.56(10) |
| N3#1-Mn1-Li1#1 | 46.45(10)  | N1#1-Mn1-Li1#1 | 46.20(10) |

**Table X1.5. (cont)**

|               |            |               |            |
|---------------|------------|---------------|------------|
| N1-Mn1-Li1#1  | 152.78(11) | N2#1-Mn1-Li1  | 163.92(11) |
| N2-Mn1-Li1    | 72.34(10)  | N3-Mn1-Li1    | 46.45(10)  |
| N3#1-Mn1-Li1  | 70.56(10)  | N1#1-Mn1-Li1  | 152.78(11) |
| N1-Mn1-Li1    | 46.19(10)  | Li1#1-Mn1-Li1 | 113.68(18) |
| N2-N1-C1      | 113.17(17) | N2-N1-Mn1     | 67.08(10)  |
| C1-N1-Mn1     | 112.15(13) | N2-N1-Li1     | 113.69(18) |
| C1-N1-Li1     | 133.09(19) | Mn1-N1-Li1    | 88.01(14)  |
| C7-N2-N1      | 113.89(17) | C7-N2-Mn1     | 116.18(15) |
| N1-N2-Mn1     | 71.47(11)  | C13-N3-N3#1   | 113.1(2)   |
| C13-N3-Mn1    | 122.92(14) | N3#1-N3-Mn1   | 69.06(5)   |
| C13-N3-Li1    | 134.07(18) | N3#1-N3-Li1   | 109.5(2)   |
| Mn1-N3-Li1    | 87.77(14)  | O1-Li1-N1     | 135.8(2)   |
| O1-Li1-N3     | 132.4(2)   | N1-Li1-N3     | 91.56(18)  |
| O1-Li1-C14#1  | 91.21(18)  | N1-Li1-C14#1  | 112.91(19) |
| N3-Li1-C14#1  | 69.36(14)  | O1-Li1-Mn1    | 175.9(2)   |
| N1-Li1-Mn1    | 45.79(10)  | N3-Li1-Mn1    | 45.77(9)   |
| C14#1-Li1-Mn1 | 91.07(13)  | C19-O1-C21    | 112.3(3)   |
| C19-O1-Li1    | 126.6(3)   | C21-O1-Li1    | 118.3(3)   |
| C2-C1-C6      | 119.0(2)   | C2-C1-N1      | 117.5(2)   |
| C6-C1-N1      | 123.5(2)   | C3-C2-C1      | 120.3(2)   |
| C4-C3-C2      | 120.5(2)   | C3-C4-C5      | 119.2(2)   |
| C6-C5-C4      | 121.1(2)   | C5-C6-C1      | 119.9(2)   |
| C8-C7-C12     | 118.7(2)   | C8-C7-N2      | 123.9(2)   |
| C12-C7-N2     | 117.3(2)   | C9-C8-C7      | 120.1(2)   |
| C10-C9-C8     | 120.8(3)   | C9-C10-C11    | 119.4(3)   |
| C12-C11-C10   | 120.9(2)   | C11-C12-C7    | 120.2(2)   |
| C14-C13-N3    | 123.25(19) | C14-C13-C18   | 118.0(2)   |
| N3-C13-C18    | 118.7(2)   | C15-C14-C13   | 120.7(2)   |
| C15-C14-Li1#1 | 126.84(19) | C13-C14-Li1#1 | 83.94(15)  |
| C16-C15-C14   | 120.6(2)   | C15-C16-C17   | 119.3(2)   |
| C18-C17-C16   | 120.9(2)   | C17-C18-C13   | 120.5(2)   |
| O1-C19-C20    | 111.1(3)   | C22-C21-O1    | 115.0(5)   |

Symmetry transformations used to generate equivalent atoms:

#1 -x+2, y, -z+3/2

**Table X1.6. Torsion angles (°) for 1a.**

|                   |             |                  |             |
|-------------------|-------------|------------------|-------------|
| N2#1-Mn1-N1-N2    | 77.42(17)   | N3-Mn1-N1-N2     | -116.10(11) |
| N3#1-Mn1-N1-N2    | -156.20(11) | N1#1-Mn1-N1-N2   | 44.30(10)   |
| Li1#1-Mn1-N1-N2   | -166.4(2)   | Li1-Mn1-N1-N2    | -116.82(18) |
| N2#1-Mn1-N1-C1    | -29.39(17)  | N2-Mn1-N1-C1     | -106.81(18) |
| N3-Mn1-N1-C1      | 137.09(14)  | N3#1-Mn1-N1-C1   | 96.98(15)   |
| N1#1-Mn1-N1-C1    | -62.51(14)  | Li1#1-Mn1-N1-C1  | 86.8(3)     |
| Li1-Mn1-N1-C1     | 136.4(2)    | N2#1-Mn1-N1-Li1  | -165.77(15) |
| N2-Mn1-N1-Li1     | 116.82(18)  | N3-Mn1-N1-Li1    | 0.72(14)    |
| N3#1-Mn1-N1-Li1   | -39.39(15)  | N1#1-Mn1-N1-Li1  | 161.12(14)  |
| Li1#1-Mn1-N1-Li1  | -49.6(4)    | C1-N1-N2-C7      | -143.55(18) |
| Mn1-N1-N2-C7      | 111.13(17)  | Li1-N1-N2-C7     | 34.2(2)     |
| C1-N1-N2-Mn1      | 105.32(15)  | Li1-N1-N2-Mn1    | -76.90(16)  |
| N2#1-Mn1-N2-C7    | 131.13(17)  | N3-Mn1-N2-C7     | -36.56(17)  |
| N3#1-Mn1-N2-C7    | -68.4(2)    | N1#1-Mn1-N2-C7   | 88.88(16)   |
| N1-Mn1-N2-C7      | -108.13(19) | Li1#1-Mn1-N2-C7  | 49.0(4)     |
| Li1-Mn1-N2-C7     | -65.60(17)  | N2#1-Mn1-N2-N1   | -120.74(12) |
| N3-Mn1-N2-N1      | 71.57(12)   | N3#1-Mn1-N2-N1   | 39.75(17)   |
| N1#1-Mn1-N2-N1    | -162.99(9)  | Li1#1-Mn1-N2-N1  | 157.2(4)    |
| Li1-Mn1-N2-N1     | 42.53(13)   | N2#1-Mn1-N3-C13  | -56.3(2)    |
| N2-Mn1-N3-C13     | 103.85(17)  | N3#1-Mn1-N3-C13  | -104.6(2)   |
| N1#1-Mn1-N3-C13   | -30.06(17)  | N1-Mn1-N3-C13    | 142.80(16)  |
| Li1#1-Mn1-N3-C13  | -59.11(18)  | Li1-Mn1-N3-C13   | 143.5(2)    |
| N2#1-Mn1-N3-N3#1  | 48.3(2)     | N2-Mn1-N3-N3#1   | -151.52(14) |
| N1#1-Mn1-N3-N3#1  | 74.57(16)   | N1-Mn1-N3-N3#1   | -112.57(15) |
| Li1#1-Mn1-N3-N3#1 | 45.51(16)   | Li1-Mn1-N3-N3#1  | -111.9(2)   |
| N2#1-Mn1-N3-Li1   | 160.17(16)  | N2-Mn1-N3-Li1    | -39.66(15)  |
| N3#1-Mn1-N3-Li1   | 111.9(2)    | N1#1-Mn1-N3-Li1  | -173.58(14) |
| N1-Mn1-N3-Li1     | -0.71(14)   | Li1#1-Mn1-N3-Li1 | 157.37(10)  |
| N2-N1-Li1-O1      | -110.8(3)   | C1-N1-Li1-O1     | 66.4(4)     |
| Mn1-N1-Li1-O1     | -174.7(3)   | N2-N1-Li1-N3     | 63.1(2)     |
| C1-N1-Li1-N3      | -119.7(2)   | Mn1-N1-Li1-N3    | -0.71(14)   |
| N2-N1-Li1-C14#1   | 131.34(18)  | C1-N1-Li1-C14#1  | -51.5(3)    |
| Mn1-N1-Li1-C14#1  | 67.49(17)   | N2-N1-Li1-Mn1    | 63.85(13)   |
| C1-N1-Li1-Mn1     | -119.0(2)   | C13-N3-Li1-O1    | 39.0(5)     |
| N3#1-N3-Li1-O1    | -118.1(3)   | Mn1-N3-Li1-O1    | 175.0(3)    |
| C13-N3-Li1-N1     | -135.3(2)   | N3#1-N3-Li1-N1   | 67.56(16)   |

**Table X1.6 (cont)**

|                    |             |                     |             |
|--------------------|-------------|---------------------|-------------|
| Mn1-N3-Li1-N1      | 0.71(14)    | C13-N3-Li1-C14#1    | 110.8(2)    |
| N3#1-N3-Li1-C14#1  | -46.38(10)  | Mn1-N3-Li1-C14#1    | -113.23(9)  |
| C13-N3-Li1-Mn1     | -136.0(2)   | N3#1-N3-Li1-Mn1     | 66.85(6)    |
| N2#1-Mn1-Li1-O1    | 163.(3)     | N2-Mn1-Li1-O1       | 76.(3)      |
| N3-Mn1-Li1-O1      | -65.(3)     | N3#1-Mn1-Li1-O1     | -106.(3)    |
| N1#1-Mn1-Li1-O1    | -51.(3)     | N1-Mn1-Li1-O1       | 114.(3)     |
| Li1#1-Mn1-Li1-O1   | -88.(3)     | N2#1-Mn1-Li1-N1     | 48.7(4)     |
| N2-Mn1-Li1-N1      | -38.31(11)  | N3-Mn1-Li1-N1       | -179.0(2)   |
| N3#1-Mn1-Li1-N1    | 139.91(15)  | N1#1-Mn1-Li1-N1     | -165.48(13) |
| Li1#1-Mn1-Li1-N1   | 157.65(16)  | N2#1-Mn1-Li1-N3     | -132.3(3)   |
| N2-Mn1-Li1-N3      | 140.70(14)  | N3#1-Mn1-Li1-N3     | -41.08(13)  |
| N1#1-Mn1-Li1-N3    | 13.5(3)     | N1-Mn1-Li1-N3       | 179.0(2)    |
| Li1#1-Mn1-Li1-N3   | -23.34(8)   | N2#1-Mn1-Li1-C14#1  | -73.0(4)    |
| N2-Mn1-Li1-C14#1   | -159.98(15) | N3-Mn1-Li1-C14#1    | 59.32(12)   |
| N3#1-Mn1-Li1-C14#1 | 18.25(10)   | N1#1-Mn1-Li1-C14#1  | 72.9(3)     |
| N1-Mn1-Li1-C14#1   | -121.67(18) | Li1#1-Mn1-Li1-C14#1 | 35.98(8)    |
| N1-Li1-O1-C19      | -26.0(5)    | N3-Li1-O1-C19       | 162.2(3)    |
| C14#1-Li1-O1-C19   | 99.5(3)     | Mn1-Li1-O1-C19      | -137.(3)    |
| N1-Li1-O1-C21      | 133.9(4)    | N3-Li1-O1-C21       | -37.9(5)    |
| C14#1-Li1-O1-C21   | -100.7(3)   | Mn1-Li1-O1-C21      | 23.(3)      |
| N2-N1-C1-C2        | -165.42(18) | Mn1-N1-C1-C2        | -91.9(2)    |
| Li1-N1-C1-C2       | 17.4(3)     | N2-N1-C1-C6         | 15.9(3)     |
| Mn1-N1-C1-C6       | 89.4(2)     | Li1-N1-C1-C6        | -161.4(2)   |
| C6-C1-C2-C3        | -0.6(3)     | N1-C1-C2-C3         | -179.4(2)   |
| C1-C2-C3-C4        | 0.6(4)      | C2-C3-C4-C5         | 0.2(4)      |
| C3-C4-C5-C6        | -0.9(4)     | C4-C5-C6-C1         | 0.9(3)      |
| C2-C1-C6-C5        | -0.2(3)     | N1-C1-C6-C5         | 178.5(2)    |
| N1-N2-C7-C8        | 23.7(3)     | Mn1-N2-C7-C8        | 103.9(2)    |
| N1-N2-C7-C12       | -159.53(19) | Mn1-N2-C7-C12       | -79.3(2)    |
| C12-C7-C8-C9       | 2.2(4)      | N2-C7-C8-C9         | 179.0(2)    |
| C7-C8-C9-C10       | -1.0(4)     | C8-C9-C10-C11       | -0.4(5)     |
| C9-C10-C11-C12     | 0.6(5)      | C10-C11-C12-C7      | 0.7(4)      |
| C8-C7-C12-C11      | -2.1(4)     | N2-C7-C12-C11       | -179.1(2)   |
| N3#1-N3-C13-C14    | 23.1(3)     | Mn1-N3-C13-C14      | 102.4(2)    |
| Li1-N3-C13-C14     | -133.4(3)   | N3#1-N3-C13-C18     | -159.21(17) |
| Mn1-N3-C13-C18     | -80.0(2)    | Li1-N3-C13-C18      | 44.3(3)     |
| N3-C13-C14-C15     | 179.8(2)    | C18-C13-C14-C15     | 2.2(3)      |



**Table X1.6 (cont)**

|                  |          |                   |           |
|------------------|----------|-------------------|-----------|
| N3-C13-C14-Li1#1 | -50.5(2) | C18-C13-C14-Li1#1 | 131.8(2)  |
| C13-C14-C15-C16  | -0.3(4)  | Li1#1-C14-C15-C16 | -107.3(3) |
| C14-C15-C16-C17  | -1.3(4)  | C15-C16-C17-C18   | 0.9(4)    |
| C16-C17-C18-C13  | 1.0(4)   | C14-C13-C18-C17   | -2.5(3)   |
| N3-C13-C18-C17   | 179.7(2) | C21-O1-C19-C20    | 166.1(4)  |
| Li1-O1-C19-C20   | -33.0(5) | C19-O1-C21-C22    | -61.8(7)  |
| Li1-O1-C21-C22   | 135.6(6) |                   |           |

Symmetry transformations used to generate equivalent atoms:

#1 -x+2, y, -z+3/2

**Table X1.7. Anisotropic atomic displacement parameters ( $\text{\AA}^2$ ) for 1a.**

The anisotropic atomic displacement factor exponent takes the form:

$$-2\pi^2 [ h^2 a^{*2} U_{11} + \dots + 2 h k a^* b^* U_{12} ]$$

|     | $U_{11}$   | $U_{22}$   | $U_{33}$   | $U_{23}$    | $U_{13}$     | $U_{12}$    |
|-----|------------|------------|------------|-------------|--------------|-------------|
| Mn1 | 0.0324(3)  | 0.0286(2)  | 0.0260(2)  | 0           | -0.00264(17) | 0           |
| N1  | 0.0338(9)  | 0.0311(9)  | 0.0293(9)  | 0.0009(7)   | -0.0003(7)   | -0.0042(7)  |
| N2  | 0.0356(10) | 0.0332(9)  | 0.0259(8)  | 0.0000(7)   | 0.0003(7)    | -0.0064(7)  |
| N3  | 0.0279(9)  | 0.0301(9)  | 0.0344(9)  | 0.0010(7)   | -0.0072(7)   | -0.0007(7)  |
| Li1 | 0.055(2)   | 0.038(2)   | 0.036(2)   | 0.0053(16)  | 0.0012(17)   | -0.0005(18) |
| O1  | 0.0563(11) | 0.0503(11) | 0.0465(10) | 0.0117(8)   | -0.0027(8)   | -0.0007(9)  |
| C1  | 0.0366(11) | 0.0339(10) | 0.0218(9)  | 0.0004(8)   | 0.0029(8)    | -0.0013(9)  |
| C2  | 0.0407(12) | 0.0391(12) | 0.0323(11) | -0.0026(9)  | 0.0044(9)    | -0.0030(9)  |
| C3  | 0.0367(12) | 0.0531(15) | 0.0409(13) | -0.0027(11) | 0.0041(10)   | -0.0036(11) |
| C4  | 0.0420(13) | 0.0549(15) | 0.0391(13) | 0.0039(11)  | 0.0075(10)   | 0.0101(11)  |
| C5  | 0.0530(14) | 0.0377(12) | 0.0343(11) | 0.0056(9)   | 0.0101(10)   | 0.0077(10)  |
| C6  | 0.0432(12) | 0.0338(11) | 0.0276(10) | 0.0027(8)   | 0.0063(9)    | -0.0009(9)  |
| C7  | 0.0377(11) | 0.0356(11) | 0.0267(10) | -0.0035(8)  | -0.0012(8)   | -0.0079(9)  |
| C8  | 0.0392(12) | 0.0533(14) | 0.0270(11) | -0.0009(9)  | -0.0001(9)   | -0.0136(10) |
| C9  | 0.0491(15) | 0.0702(19) | 0.0311(12) | 0.0056(11)  | -0.0080(11)  | -0.0145(13) |
| C10 | 0.0423(14) | 0.082(2)   | 0.0450(15) | 0.0041(14)  | -0.0126(11)  | -0.0160(14) |
| C11 | 0.0378(13) | 0.0661(17) | 0.0454(14) | -0.0036(13) | 0.0024(11)   | -0.0196(12) |
| C12 | 0.0436(13) | 0.0444(13) | 0.0289(11) | -0.0024(9)  | 0.0030(9)    | -0.0140(10) |
| C13 | 0.0310(10) | 0.0280(10) | 0.0377(11) | 0.0087(8)   | -0.0044(8)   | -0.0016(8)  |
| C14 | 0.0359(11) | 0.0320(11) | 0.0390(12) | 0.0048(9)   | -0.0044(9)   | 0.0018(9)   |
| C15 | 0.0473(14) | 0.0387(12) | 0.0442(13) | 0.0045(10)  | 0.0041(10)   | 0.0070(10)  |
| C16 | 0.0350(12) | 0.0521(15) | 0.0613(16) | 0.0109(13)  | 0.0077(11)   | 0.0072(11)  |

|     | U <sub>11</sub> | U <sub>22</sub> | U <sub>33</sub> | U <sub>23</sub> | U <sub>13</sub> | U <sub>12</sub> |
|-----|-----------------|-----------------|-----------------|-----------------|-----------------|-----------------|
| C17 | 0.0310(11)      | 0.0449(14)      | 0.0600(16)      | 0.0101(12)      | -0.0045(10)     | -0.0029(10)     |
| C18 | 0.0332(11)      | 0.0347(11)      | 0.0466(13)      | 0.0066(10)      | -0.0076(9)      | -0.0031(9)      |
| C19 | 0.082(3)        | 0.104(3)        | 0.056(2)        | 0.018(2)        | 0.0121(18)      | 0.005(2)        |
| C20 | 0.111(3)        | 0.092(3)        | 0.071(2)        | -0.016(2)       | 0.017(2)        | 0.008(3)        |
| C21 | 0.079(3)        | 0.120(4)        | 0.095(3)        | 0.049(3)        | 0.002(2)        | 0.027(3)        |
| C22 | 0.157(6)        | 0.134(6)        | 0.223(9)        | 0.091(6)        | 0.018(6)        | 0.042(5)        |

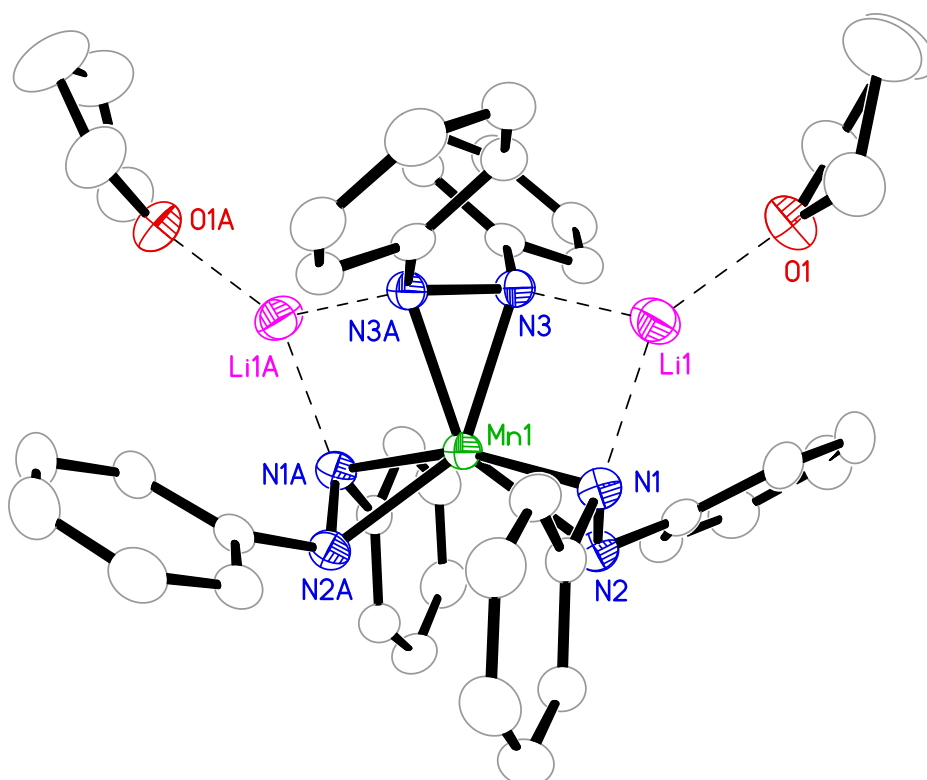

**Figure X2.** Structure of of  $\text{Li}_2\text{Mn}(\text{N}_2\text{Ph}_2)_3(\text{Et}_2\text{O})_2$  (**1a**) with thermal ellipsoids at 50% probability level. Hydrogen atoms are omitted for clarity.

**Table X2.1. Sample and crystal data for 1b.**

|                               |                                                                                 |                  |
|-------------------------------|---------------------------------------------------------------------------------|------------------|
| <b>Chemical formula</b>       | C <sub>44</sub> H <sub>46</sub> Li <sub>2</sub> MnN <sub>6</sub> O <sub>2</sub> |                  |
| <b>Formula weight</b>         | 759.69                                                                          |                  |
| <b>Temperature</b>            | 173(2) K                                                                        |                  |
| <b>Wavelength</b>             | 0.71073 Å                                                                       |                  |
| <b>Crystal size</b>           | 0.080 x 0.150 x 0.200 mm                                                        |                  |
| <b>Crystal system</b>         | monoclinic                                                                      |                  |
| <b>Space group</b>            | C 1 2/c 1                                                                       |                  |
| <b>Unit cell dimensions</b>   | a = 12.0250(7) Å                                                                | α = 90°          |
|                               | b = 17.5310(10) Å                                                               | β = 95.1030(10)° |
|                               | c = 18.7595(11) Å                                                               | γ = 90°          |
| <b>Volume</b>                 | 3939.0(4) Å <sup>3</sup>                                                        |                  |
| <b>Z</b>                      | 4                                                                               |                  |
| <b>Density (calculated)</b>   | 1.281 Mg/cm <sup>3</sup>                                                        |                  |
| <b>Absorption coefficient</b> | 0.380 mm <sup>-1</sup>                                                          |                  |
| <b>F(000)</b>                 | 1596                                                                            |                  |

**Table X2.2. Data collection and structure refinement for 1b.**

|                                         |                                                                                                                                                                       |                           |
|-----------------------------------------|-----------------------------------------------------------------------------------------------------------------------------------------------------------------------|---------------------------|
| <b>Theta range for data collection</b>  | 2.06 to 27.88°                                                                                                                                                        |                           |
| <b>Index ranges</b>                     | -15 ≤ h ≤ 15, -22 ≤ k ≤ 23, -24 ≤ l ≤ 24                                                                                                                              |                           |
| <b>Reflections collected</b>            | 18662                                                                                                                                                                 |                           |
| <b>Independent reflections</b>          | 4676 [R(int) = 0.0253]                                                                                                                                                |                           |
| <b>Max. and min. transmission</b>       | 0.9702 and 0.9279                                                                                                                                                     |                           |
| <b>Structure solution technique</b>     | direct methods                                                                                                                                                        |                           |
| <b>Structure solution program</b>       | SHELXS-97 (Sheldrick, 2008)                                                                                                                                           |                           |
| <b>Refinement method</b>                | Full-matrix least-squares on F <sup>2</sup>                                                                                                                           |                           |
| <b>Refinement program</b>               | SHELXL-97 (Sheldrick, 2008)                                                                                                                                           |                           |
| <b>Function minimized</b>               | Σ w(F <sub>o</sub> <sup>2</sup> - F <sub>c</sub> <sup>2</sup> ) <sup>2</sup>                                                                                          |                           |
| <b>Data / restraints / parameters</b>   | 4676 / 0 / 249                                                                                                                                                        |                           |
| <b>Goodness-of-fit on F<sup>2</sup></b> | 1.025                                                                                                                                                                 |                           |
| <b>Δ/σ<sub>max</sub></b>                | 0.001                                                                                                                                                                 |                           |
| <b>Final R indices</b>                  | 3858 data; I > 2σ(I)                                                                                                                                                  | R1 = 0.0341, wR2 = 0.0835 |
|                                         | all data                                                                                                                                                              | R1 = 0.0468, wR2 = 0.0897 |
| <b>Weighting scheme</b>                 | w = 1/[σ <sup>2</sup> (F <sub>o</sub> <sup>2</sup> ) + (0.0394P) <sup>2</sup> + 3.4189P]<br>where P = (F <sub>o</sub> <sup>2</sup> + 2F <sub>c</sub> <sup>2</sup> )/3 |                           |
| <b>Largest diff. peak and hole</b>      | 0.375 and -0.259 eÅ <sup>-3</sup>                                                                                                                                     |                           |
| <b>R.M.S. deviation from mean</b>       | 0.044 eÅ <sup>-3</sup>                                                                                                                                                |                           |

**Table X2.3. Atomic coordinates and equivalent isotropic atomic displacement parameters ( $\text{\AA}^2$ ) for 1b.**

U(eq) is defined as one third of the trace of the orthogonalized  $U_{ij}$  tensor.

|     | x/a         | y/b          | z/c         | U(eq)      |
|-----|-------------|--------------|-------------|------------|
| Mn1 | 0.0         | 0.023238(16) | 0.75        | 0.02051(9) |
| Li1 | 0.0089(2)   | 0.11120(15)  | 0.62425(15) | 0.0336(6)  |
| N3  | 0.95397(9)  | 0.13128(6)   | 0.72233(6)  | 0.0219(2)  |
| N2  | 0.96663(10) | 0.95615(7)   | 0.66670(6)  | 0.0232(2)  |
| N1  | 0.05727(10) | 0.00411(7)   | 0.65315(6)  | 0.0229(2)  |
| O1  | 0.99919(10) | 0.17440(7)   | 0.54152(6)  | 0.0366(3)  |
| C21 | 0.0625(2)   | 0.28022(13)  | 0.48265(14) | 0.0693(7)  |
| C7  | 0.86725(11) | 0.97313(8)   | 0.62435(7)  | 0.0227(3)  |
| C1  | 0.16131(11) | 0.96589(8)   | 0.65943(7)  | 0.0224(3)  |
| C8  | 0.86257(13) | 0.01041(9)   | 0.55821(8)  | 0.0272(3)  |
| C3  | 0.36225(13) | 0.97722(10)  | 0.66988(9)  | 0.0333(3)  |
| C2  | 0.25780(12) | 0.01095(9)   | 0.66332(8)  | 0.0271(3)  |
| C12 | 0.76707(13) | 0.94785(9)   | 0.64966(8)  | 0.0281(3)  |
| C13 | 0.85593(11) | 0.16352(8)   | 0.74408(8)  | 0.0220(3)  |
| C9  | 0.76032(14) | 0.02484(10)  | 0.52011(9)  | 0.0354(4)  |
| C15 | 0.75401(13) | 0.24472(9)   | 0.82015(9)  | 0.0313(3)  |
| C6  | 0.17220(13) | 0.88662(8)   | 0.66048(8)  | 0.0268(3)  |
| C14 | 0.85443(12) | 0.21507(8)   | 0.80132(8)  | 0.0259(3)  |
| C17 | 0.65487(12) | 0.17511(9)   | 0.72522(9)  | 0.0306(3)  |
| C18 | 0.75386(12) | 0.14504(8)   | 0.70559(8)  | 0.0255(3)  |
| C5  | 0.27751(13) | 0.85381(9)   | 0.66646(8)  | 0.0319(3)  |
| C11 | 0.66641(13) | 0.96200(10)  | 0.61045(10) | 0.0362(4)  |
| C16 | 0.65396(13) | 0.22490(10)  | 0.78294(9)  | 0.0340(4)  |
| C10 | 0.66242(14) | 0.00133(11)  | 0.54615(10) | 0.0415(4)  |
| C4  | 0.37273(13) | 0.89836(10)  | 0.67171(9)  | 0.0358(4)  |
| C22 | 0.08426(17) | 0.19763(11)  | 0.49683(11) | 0.0466(5)  |
| C19 | 0.90241(17) | 0.22097(12)  | 0.52391(12) | 0.0511(5)  |
| C20 | 0.9386(2)   | 0.28762(14)  | 0.48342(15) | 0.0749(8)  |

**Table X2.4. Bond lengths (Å) for 1b.**

|           |            |          |            |
|-----------|------------|----------|------------|
| Mn1-N2    | 1.9685(12) | Mn1-N2#1 | 1.9685(12) |
| Mn1-N1#1  | 2.0273(12) | Mn1-N1   | 2.0274(12) |
| Mn1-N3    | 2.0279(12) | Mn1-N3#1 | 2.0280(12) |
| Mn1-Li1#1 | 2.828(3)   | Li1-O1   | 1.902(3)   |
| Li1-N1    | 2.025(3)   | Li1-N3   | 2.040(3)   |
| Li1-C14#1 | 2.749(3)   | N3-C13   | 1.4004(17) |
| N3-N3#1   | 1.449(2)   | N2-C7    | 1.4067(18) |
| N2-N1     | 1.4173(16) | N1-C1    | 1.4149(18) |
| O1-C19    | 1.436(2)   | O1-C22   | 1.438(2)   |
| C21-C22   | 1.491(3)   | C21-C20  | 1.498(4)   |
| C7-C8     | 1.399(2)   | C7-C12   | 1.405(2)   |
| C1-C6     | 1.396(2)   | C1-C2    | 1.400(2)   |
| C8-C9     | 1.389(2)   | C3-C2    | 1.384(2)   |
| C3-C4     | 1.388(2)   | C12-C11  | 1.382(2)   |
| C13-C14   | 1.405(2)   | C13-C18  | 1.4054(19) |
| C9-C10    | 1.377(2)   | C15-C16  | 1.381(2)   |
| C15-C14   | 1.389(2)   | C6-C5    | 1.386(2)   |
| C14-Li1#1 | 2.749(3)   | C17-C18  | 1.381(2)   |
| C17-C16   | 1.392(2)   | C5-C4    | 1.382(2)   |
| C11-C10   | 1.386(3)   | C19-C20  | 1.480(3)   |

Symmetry transformations used to generate equivalent atoms:

#1 -x+2, y, -z+3/2

**Table X2.5. Bond angles (°) for 1b.**

|                |           |                |           |
|----------------|-----------|----------------|-----------|
| N2-Mn1-N2#1    | 106.62(7) | N2-Mn1-N1#1    | 123.44(5) |
| N2#1-Mn1-N1#1  | 41.52(5)  | N2-Mn1-N1      | 41.52(5)  |
| N2#1-Mn1-N1    | 123.44(5) | N1#1-Mn1-N1    | 160.96(7) |
| N2-Mn1-N3      | 108.85(5) | N2#1-Mn1-N3    | 142.47(5) |
| N1#1-Mn1-N3    | 106.09(5) | N1-Mn1-N3      | 91.83(5)  |
| N2-Mn1-N3#1    | 142.46(5) | N2#1-Mn1-N3#1  | 108.86(5) |
| N1#1-Mn1-N3#1  | 91.83(5)  | N1-Mn1-N3#1    | 106.09(5) |
| N3-Mn1-N3#1    | 41.86(6)  | N2-Mn1-Li1#1   | 165.42(7) |
| N2#1-Mn1-Li1#1 | 71.57(7)  | N1#1-Mn1-Li1#1 | 45.71(6)  |
| N1-Mn1-Li1#1   | 151.48(7) | N3-Mn1-Li1#1   | 71.00(7)  |

**Table X2.5 (cont)**

|                |            |               |            |
|----------------|------------|---------------|------------|
| N3#1-Mn1-Li1#1 | 46.13(6)   | O1-Li1-N1     | 138.92(16) |
| O1-Li1-N3      | 129.36(15) | N1-Li1-N3     | 91.54(12)  |
| O1-Li1-C14#1   | 91.09(11)  | N1-Li1-C14#1  | 109.48(12) |
| N3-Li1-C14#1   | 69.79(9)   | C13-N3-N3#1   | 113.62(13) |
| C13-N3-Mn1     | 121.33(9)  | N3#1-N3-Mn1   | 69.07(3)   |
| C13-N3-Li1     | 132.91(12) | N3#1-N3-Li1   | 110.99(13) |
| Mn1-N3-Li1     | 88.10(9)   | C7-N2-N1      | 113.67(11) |
| C7-N2-Mn1      | 115.14(9)  | N1-N2-Mn1     | 71.47(7)   |
| C1-N1-N2       | 113.11(11) | C1-N1-Li1     | 133.80(12) |
| N2-N1-Li1      | 113.00(12) | C1-N1-Mn1     | 111.84(9)  |
| N2-N1-Mn1      | 67.02(7)   | Li1-N1-Mn1    | 88.52(9)   |
| C19-O1-C22     | 107.99(14) | C19-O1-Li1    | 120.56(14) |
| C22-O1-Li1     | 130.21(14) | C22-C21-C20   | 103.96(19) |
| C8-C7-C12      | 118.61(13) | C8-C7-N2      | 124.39(13) |
| C12-C7-N2      | 116.95(13) | C6-C1-C2      | 119.00(13) |
| C6-C1-N1       | 123.62(13) | C2-C1-N1      | 117.37(13) |
| C9-C8-C7       | 120.35(14) | C2-C3-C4      | 120.49(15) |
| C3-C2-C1       | 120.33(14) | C11-C12-C7    | 120.02(15) |
| N3-C13-C14     | 123.41(12) | N3-C13-C18    | 118.46(13) |
| C14-C13-C18    | 118.11(13) | C10-C9-C8     | 120.55(16) |
| C16-C15-C14    | 121.03(15) | C5-C6-C1      | 119.88(14) |
| C15-C14-C13    | 120.38(14) | C15-C14-Li1#1 | 127.78(12) |
| C13-C14-Li1#1  | 85.09(10)  | C18-C17-C16   | 120.89(14) |
| C17-C18-C13    | 120.59(14) | C4-C5-C6      | 121.08(15) |
| C12-C11-C10    | 120.88(15) | C15-C16-C17   | 118.98(14) |
| C9-C10-C11     | 119.53(15) | C5-C4-C3      | 119.22(14) |
| O1-C22-C21     | 104.86(16) | O1-C19-C20    | 107.33(17) |
| C19-C20-C21    | 105.94(18) |               |            |

Symmetry transformations used to generate equivalent atoms:

#1 -x+2, y, -z+3/2

**Table X2.6. Torsion angles (°) for 1b.**

|                   |             |                  |             |
|-------------------|-------------|------------------|-------------|
| N2-Mn1-N3-C13     | 103.37(11)  | N2#1-Mn1-N3-C13  | -56.77(13)  |
| N1#1-Mn1-N3-C13   | -31.43(11)  | N1-Mn1-N3-C13    | 142.04(10)  |
| N3#1-Mn1-N3-C13   | -105.63(15) | Li1#1-Mn1-N3-C13 | -61.21(11)  |
| N2-Mn1-N3-N3#1    | -151.00(9)  | N2#1-Mn1-N3-N3#1 | 48.86(13)   |
| N1#1-Mn1-N3-N3#1  | 74.21(10)   | N1-Mn1-N3-N3#1   | -112.32(9)  |
| Li1#1-Mn1-N3-N3#1 | 44.42(10)   | N2-Mn1-N3-Li1    | -37.64(10)  |
| N2#1-Mn1-N3-Li1   | 162.21(10)  | N1#1-Mn1-N3-Li1  | -172.44(9)  |
| N1-Mn1-N3-Li1     | 1.03(9)     | N3#1-Mn1-N3-Li1  | 113.35(13)  |
| Li1#1-Mn1-N3-Li1  | 157.78(6)   | O1-Li1-N3-C13    | 42.0(3)     |
| N1-Li1-N3-C13     | -133.83(13) | C14#1-Li1-N3-C13 | 115.95(14)  |
| O1-Li1-N3-N3#1    | -118.54(18) | N1-Li1-N3-N3#1   | 65.67(11)   |
| C14#1-Li1-N3-N3#1 | -44.55(7)   | O1-Li1-N3-Mn1    | 174.76(19)  |
| N1-Li1-N3-Mn1     | -1.03(9)    | C14#1-Li1-N3-Mn1 | -111.25(6)  |
| N2#1-Mn1-N2-C7    | 129.88(11)  | N1#1-Mn1-N2-C7   | 87.55(11)   |
| N1-Mn1-N2-C7      | -108.08(12) | N3-Mn1-N2-C7     | -37.65(11)  |
| N3#1-Mn1-N2-C7    | -69.72(12)  | Li1#1-Mn1-N2-C7  | 49.3(3)     |
| N2#1-Mn1-N2-N1    | -122.04(8)  | N1#1-Mn1-N2-N1   | -164.37(6)  |
| N3-Mn1-N2-N1      | 70.43(8)    | N3#1-Mn1-N2-N1   | 38.36(11)   |
| Li1#1-Mn1-N2-N1   | 157.4(3)    | C7-N2-N1-C1      | -145.01(12) |
| Mn1-N2-N1-C1      | 104.97(10)  | C7-N2-N1-Li1     | 32.17(16)   |
| Mn1-N2-N1-Li1     | -77.85(11)  | C7-N2-N1-Mn1     | 110.02(10)  |
| O1-Li1-N1-C1      | 66.6(3)     | N3-Li1-N1-C1     | -118.37(15) |
| C14#1-Li1-N1-C1   | -49.3(2)    | O1-Li1-N1-N2     | -109.8(2)   |
| N3-Li1-N1-N2      | 65.23(14)   | C14#1-Li1-N1-N2  | 134.30(11)  |
| O1-Li1-N1-Mn1     | -174.0(2)   | N3-Li1-N1-Mn1    | 1.03(9)     |
| C14#1-Li1-N1-Mn1  | 70.11(10)   | N2-Mn1-N1-C1     | -106.82(12) |
| N2#1-Mn1-N1-C1    | -30.06(11)  | N1#1-Mn1-N1-C1   | -63.25(9)   |
| N3-Mn1-N1-C1      | 136.32(9)   | N3#1-Mn1-N1-C1   | 96.35(9)    |
| Li1#1-Mn1-N1-C1   | 84.89(17)   | N2#1-Mn1-N1-N2   | 76.76(11)   |
| N1#1-Mn1-N1-N2    | 43.57(6)    | N3-Mn1-N1-N2     | -116.86(7)  |
| N3#1-Mn1-N1-N2    | -156.83(7)  | Li1#1-Mn1-N1-N2  | -168.29(14) |
| N2-Mn1-N1-Li1     | 115.82(11)  | N2#1-Mn1-N1-Li1  | -167.42(9)  |
| N1#1-Mn1-N1-Li1   | 159.39(9)   | N3-Mn1-N1-Li1    | -1.04(9)    |
| N3#1-Mn1-N1-Li1   | -41.01(10)  | Li1#1-Mn1-N1-Li1 | -52.5(2)    |
| N1-Li1-O1-C19     | 136.9(2)    | N3-Li1-O1-C19    | -36.7(3)    |
| C14#1-Li1-O1-C19  | -101.13(16) | N1-Li1-O1-C22    | -57.4(3)    |

**Table X2.6 (cont)**

|                  |             |                   |             |
|------------------|-------------|-------------------|-------------|
| N3-Li1-O1-C22    | 129.0(2)    | C14#1-Li1-O1-C22  | 64.56(18)   |
| N1-N2-C7-C8      | 23.72(19)   | Mn1-N2-C7-C8      | 103.49(14)  |
| N1-N2-C7-C12     | -158.91(12) | Mn1-N2-C7-C12     | -79.14(14)  |
| N2-N1-C1-C6      | 15.52(19)   | Li1-N1-C1-C6      | -160.88(16) |
| Mn1-N1-C1-C6     | 88.88(14)   | N2-N1-C1-C2       | -165.79(12) |
| Li1-N1-C1-C2     | 17.8(2)     | Mn1-N1-C1-C2      | -92.43(13)  |
| C12-C7-C8-C9     | 2.7(2)      | N2-C7-C8-C9       | -179.94(14) |
| C4-C3-C2-C1      | 0.9(2)      | C6-C1-C2-C3       | -1.6(2)     |
| N1-C1-C2-C3      | 179.67(13)  | C8-C7-C12-C11     | -1.9(2)     |
| N2-C7-C12-C11    | -179.46(14) | N3#1-N3-C13-C14   | 22.34(16)   |
| Mn1-N3-C13-C14   | 101.38(14)  | Li1-N3-C13-C14    | -137.76(16) |
| N3#1-N3-C13-C18  | -159.41(10) | Mn1-N3-C13-C18    | -80.37(14)  |
| Li1-N3-C13-C18   | 40.5(2)     | C7-C8-C9-C10      | -1.3(2)     |
| C2-C1-C6-C5      | 1.0(2)      | N1-C1-C6-C5       | 179.69(13)  |
| C16-C15-C14-C13  | -0.6(2)     | C16-C15-C14-Li1#1 | -109.77(18) |
| N3-C13-C14-C15   | -179.83(13) | C18-C13-C14-C15   | 1.9(2)      |
| N3-C13-C14-Li1#1 | -48.34(14)  | C18-C13-C14-Li1#1 | 133.41(13)  |
| C16-C17-C18-C13  | 0.7(2)      | N3-C13-C18-C17    | 179.68(13)  |
| C14-C13-C18-C17  | -2.0(2)     | C1-C6-C5-C4       | 0.3(2)      |
| C7-C12-C11-C10   | -0.3(2)     | C14-C15-C16-C17   | -0.8(2)     |
| C18-C17-C16-C15  | 0.7(2)      | C8-C9-C10-C11     | -0.9(3)     |
| C12-C11-C10-C9   | 1.7(3)      | C6-C5-C4-C3       | -1.0(3)     |
| C2-C3-C4-C5      | 0.4(3)      | C19-O1-C22-C21    | 29.8(2)     |
| Li1-O1-C22-C21   | -137.3(2)   | C20-C21-C22-O1    | -31.1(2)    |
| C22-O1-C19-C20   | -16.3(2)    | Li1-O1-C19-C20    | 152.31(19)  |
| O1-C19-C20-C21   | -3.7(3)     | C22-C21-C20-C19   | 21.2(3)     |

Symmetry transformations used to generate equivalent atoms:

#1 -x+2, y, -z+3/2



**Table X2.7. Anisotropic atomic displacement parameters ( $\text{\AA}^2$ ) for 1b.**

The anisotropic atomic displacement factor exponent takes the form:

$$-2\pi^2 [ h^2 a^{*2} U_{11} + \dots + 2 h k a^* b^* U_{12} ]$$

|     | $U_{11}$    | $U_{22}$    | $U_{33}$    | $U_{23}$   | $U_{13}$    | $U_{12}$    |
|-----|-------------|-------------|-------------|------------|-------------|-------------|
| Mn1 | 0.01953(15) | 0.01932(15) | 0.02259(16) | 0          | 0.00131(11) | 0           |
| Li1 | 0.0393(15)  | 0.0289(13)  | 0.0329(14)  | 0.0045(11) | 0.0046(12)  | 0.0050(11)  |
| N3  | 0.0181(6)   | 0.0205(6)   | 0.0263(6)   | -0.0005(5) | -0.0019(5)  | 0.0000(4)   |
| N2  | 0.0203(6)   | 0.0235(6)   | 0.0257(6)   | -0.0012(5) | 0.0023(5)   | -0.0019(4)  |
| N1  | 0.0203(6)   | 0.0230(6)   | 0.0258(6)   | -0.0009(5) | 0.0031(5)   | -0.0010(4)  |
| O1  | 0.0377(6)   | 0.0378(6)   | 0.0344(6)   | 0.0102(5)  | 0.0036(5)   | 0.0031(5)   |
| C21 | 0.0911(19)  | 0.0494(13)  | 0.0710(16)  | 0.0176(11) | 0.0264(14)  | -0.0061(12) |
| C7  | 0.0234(7)   | 0.0206(6)   | 0.0241(7)   | -0.0062(5) | 0.0017(5)   | -0.0007(5)  |
| C1  | 0.0227(7)   | 0.0257(7)   | 0.0193(6)   | -0.0016(5) | 0.0043(5)   | 0.0021(5)   |
| C8  | 0.0264(7)   | 0.0318(8)   | 0.0236(7)   | -0.0045(6) | 0.0039(6)   | -0.0030(6)  |
| C3  | 0.0229(7)   | 0.0393(9)   | 0.0384(9)   | -0.0034(7) | 0.0057(6)   | -0.0006(6)  |
| C2  | 0.0253(7)   | 0.0261(7)   | 0.0302(8)   | -0.0035(6) | 0.0041(6)   | 0.0001(6)   |
| C12 | 0.0288(8)   | 0.0264(7)   | 0.0293(8)   | -0.0026(6) | 0.0040(6)   | -0.0051(6)  |
| C13 | 0.0208(6)   | 0.0180(6)   | 0.0271(7)   | 0.0043(5)  | 0.0011(5)   | 0.0005(5)   |
| C9  | 0.0371(9)   | 0.0412(9)   | 0.0266(8)   | 0.0002(7)  | -0.0053(7)  | -0.0032(7)  |
| C15 | 0.0347(8)   | 0.0270(8)   | 0.0324(8)   | -0.0017(6) | 0.0040(6)   | 0.0060(6)   |
| C6  | 0.0286(7)   | 0.0255(7)   | 0.0268(7)   | -0.0001(6) | 0.0059(6)   | 0.0005(6)   |
| C14 | 0.0246(7)   | 0.0230(7)   | 0.0294(8)   | 0.0003(6)  | -0.0019(6)  | 0.0015(5)   |
| C17 | 0.0211(7)   | 0.0317(8)   | 0.0382(9)   | 0.0052(7)  | -0.0013(6)  | 0.0011(6)   |
| C18 | 0.0239(7)   | 0.0222(7)   | 0.0297(8)   | 0.0011(6)  | -0.0008(6)  | 0.0004(5)   |
| C5  | 0.0365(9)   | 0.0273(8)   | 0.0332(8)   | 0.0021(6)  | 0.0099(7)   | 0.0081(6)   |
| C11 | 0.0243(8)   | 0.0387(9)   | 0.0457(10)  | -0.0031(7) | 0.0032(7)   | -0.0085(6)  |
| C16 | 0.0257(8)   | 0.0361(9)   | 0.0410(9)   | 0.0039(7)  | 0.0077(7)   | 0.0078(6)   |
| C10 | 0.0279(8)   | 0.0487(10)  | 0.0453(10)  | -0.0004(8) | -0.0113(7)  | -0.0038(7)  |
| C4  | 0.0269(8)   | 0.0418(9)   | 0.0395(9)   | 0.0026(7)  | 0.0073(7)   | 0.0112(7)   |
| C22 | 0.0510(11)  | 0.0491(11)  | 0.0421(10)  | 0.0035(8)  | 0.0175(9)   | 0.0026(9)   |
| C19 | 0.0458(11)  | 0.0547(12)  | 0.0531(12)  | 0.0114(9)  | 0.0057(9)   | 0.0135(9)   |
| C20 | 0.0844(18)  | 0.0552(14)  | 0.0855(18)  | 0.0321(13) | 0.0096(14)  | 0.0193(13)  |
